# Supplementary material for: Maternal diet with sea urchin gangliosides promotes neurodevelopment of young offspringviaenhancing NGF and BDNF expression
Source: Royal Society of Chemistry journal article supplement (doi:10.1039/d0fo01605e), 2020-01-01

## Supporting Information

**Fig. S1.** Effect of SU-GLS on the morphology development of P15 mice brain (n = 4 females and 4 males). Representative Golgi-Cox staining showing the neuron morphology in hippocampus of female or male offspring (200  $\mu$ m). Red box showed the CA1 region of hippocampus.

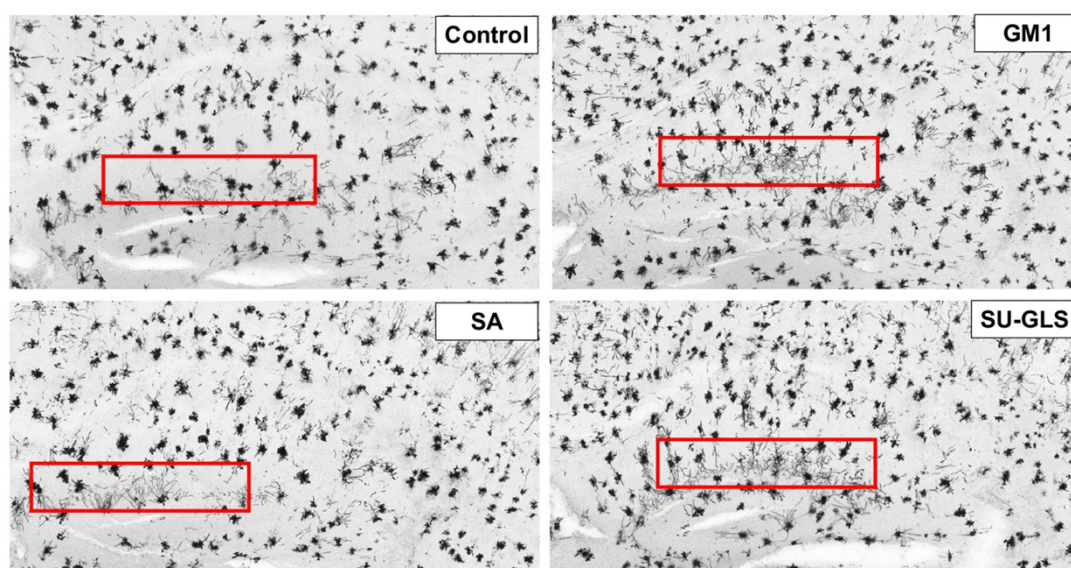

**Fig. S2.** Effect of SU-GLS on the neurodevelopment on mother mice. (A) mRNA levels of GAP-43 and (B) MAP-2 were analyzed by RT-qPCR (n = 3). (C) Immunohistochemistry analysis of the distribution and expression of ChAT in the hippocampus and cortex of mother mice (200  $\mu$ m) (n = 3). Different letters indicated significant difference among four groups ( $p < 0.05$ , one-way ANOVA).

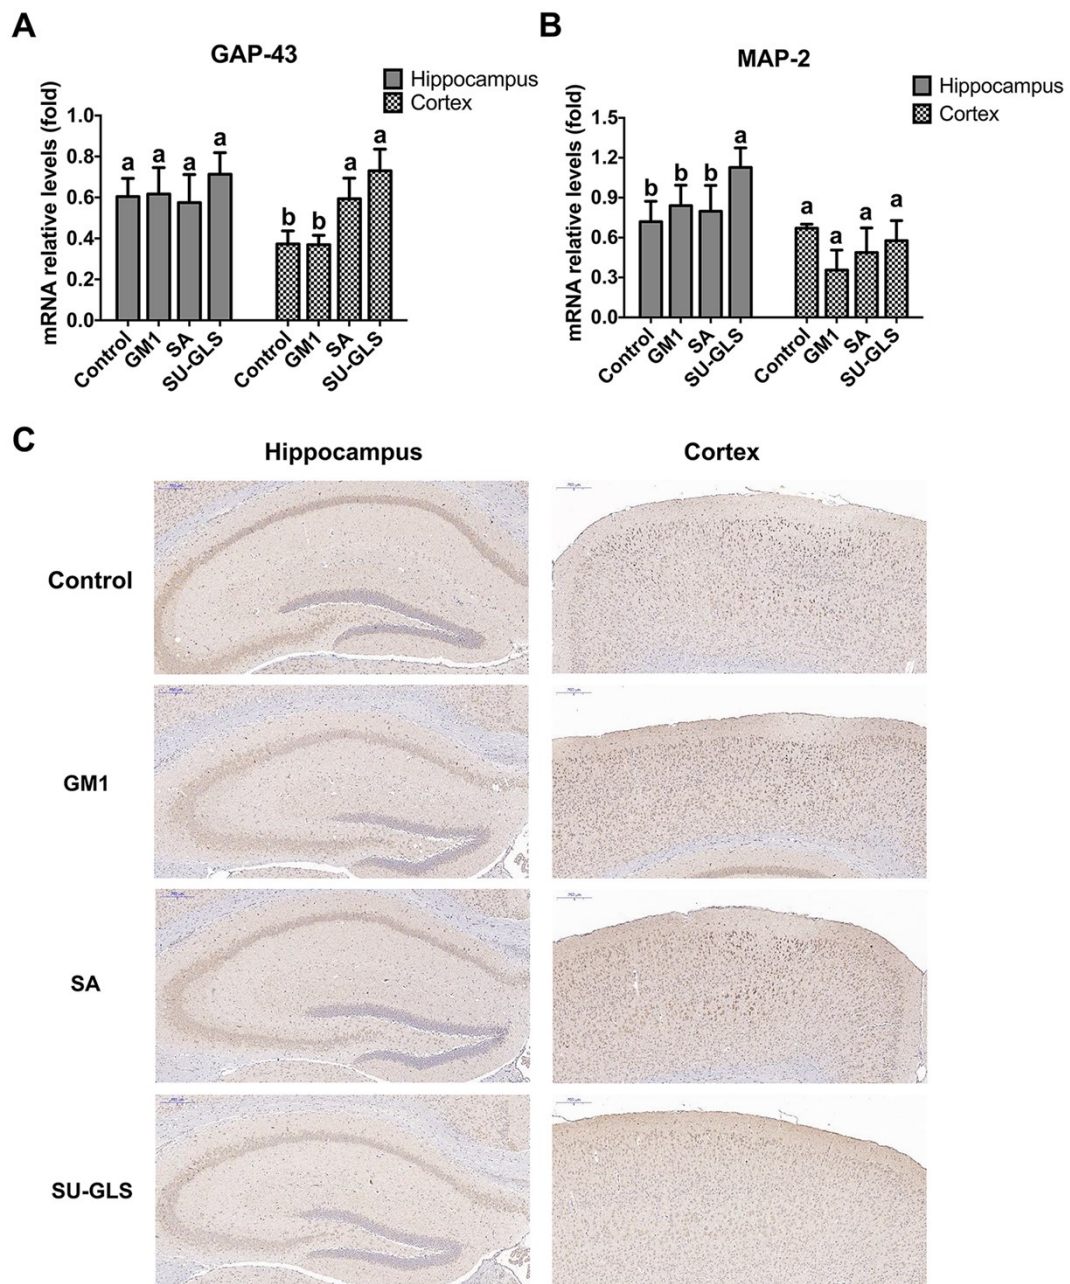

Supplement: d0fo01605e1.pdf [file d0fo01605e1.pdf]
